# Supplementary material
Source: PubMed Central journal article supplement (PMC6045528)
Supplement: 12192_2017_872_MOESM1_ESM.pdf [file 12192_2017_872_MOESM1_ESM.pdf]

1 **Supporting information for:**

2  
3 **Exendin-4 improves ER stress-induced lipid accumulation and regulates lipin-1 signaling in HepG2 cells**

4  
5 Jinmi Lee<sup>a</sup>, Seok-Woo Hong<sup>a</sup>, Hyemi Kwon<sup>b</sup>, Se Eun Park<sup>b</sup>, Eun-Jung Rhee<sup>b</sup>, Cheol-Young Park<sup>b</sup>, Ki-Won Oh<sup>b</sup>,  
6 Sung-Woo Park<sup>b</sup>, Won-Young Lee<sup>b</sup>

7  
8 <sup>a</sup>Institute of Medical Research, Kangbuk Samsung Hospital, Sungkyunkwan University School of Medicine,  
9 Seoul 03181, Republic of Korea

10 <sup>b</sup>Department of Endocrinology and Metabolism, Kangbuk Samsung Hospital, Sungkyunkwan University School  
11 of Medicine, Seoul 03181, Republic of Korea

12  
13  
14  
15  
16 **Correspondence:**

17 Won-Young Lee, MD, PhD  
18 Division of Endocrinology and Metabolism  
19 Department of Internal Medicine, Kangbuk Samsung Hospital  
20 Sungkyunkwan University School of Medicine  
21 #29 Seamunan-ro, Jongro-Ku, Seoul 03181, Republic of Korea  
22 Tel: 82-2-2001-2579  
23 Fax: 82-2-2001-2049  
24 E-mail: [wonyoung2.lee@samsung.com](mailto:wonyoung2.lee@samsung.com), [drlwy@hanmail.net](mailto:drlwy@hanmail.net)

1 **Supplementary Material**

2

3 **Supplementary Table 1** List of human primers used for quantitative RT-PCR.

4

| Gene             | Forward sequence (5'→3')  | Reverse sequence (5'→3') | Size (bp) |
|------------------|---------------------------|--------------------------|-----------|
| PLIN 1           | GATCATGAGGACCAGACAGA      | CTGCTACCTCACTGAACTTG     | 92        |
| PLIN 2           | ACAGACCATTTCTCAGCTCCAT    | TATCCAATGCTCCTTTTCCACT   | 141       |
| PLIN 3           | GAACAGAGCTACTTCGTACG      | CAGTTTCCATCAGGCTTAGG     | 151       |
| CIDEC            | AGTGTTTCATGGTCCTCCAGA     | TTCAGGCAGCCAATGAAGTC     | 165       |
| ATGL             | AGGCTGGTGCCAAGTTCATT      | CATGCTCATGGCTATCAGCA     | 138       |
| HSL              | AGGAGCCAGCATTGAGACAAA     | CGCAGGTGTTGATTGAGCTTC    | 95        |
| MGL              | AGAGGATGGTAGTGTCTGAC      | AGGGTAGTCTTTCTGCATGG     | 80        |
| MTP              | ACAAGCTCACGTACTCCACTG     | TCCTCCATAGTAAGGCCACATC   | 111       |
| APOB             | AAGTGCCACCAGGATCAACT      | TGCAGCAAACCTCCTCAGAGT    | 160       |
| SFRS10           | GTAGCAGGTCTTACAGTCGA      | TGCGAGTAGACATGGGAGAA     | 70        |
| Lipin 1          | TGCTGGAGAGCAGCAGAAGCTC    | TAGGGTATGAGGCTGACTGAG    | 111       |
| Lipin 1 $\alpha$ | TGCTGGAGAGCAGCAGAAGCTC    | GAACCGGAAGGACTGGGAGTG    | 147       |
| Lipin 1 $\beta$  | TGCTGGAGAGCAGCAGAAGCTC    | CCTTTTGCAATCTACCAGGC     | 164       |
| SIRT1            | ACATAGACACGCTGGAACAG      | AGGACATCGAGGAACTACCT     | 152       |
| AMPK             | ACAGGCATATGGTGGTCCATAGAGA | TTGGGTGAGCCACAACCTTGTTT  | 142       |
| VLDLR            | CTGGGTATGCGACGATGATG      | CTTGGTGTGTATGACTGGCTG    | 88        |
| XBP-1s           | GAGATCGAAAGAAGGCTCGA      | CCTGGTTCTCAACTACAAGG     | 132       |
| $\beta$ -actin   | TCATGAAGATCCTCACCGAG      | CATCTCTTGCTCGAAGTCCA     | 116       |

5

6

7

8

9

10

11

12

1

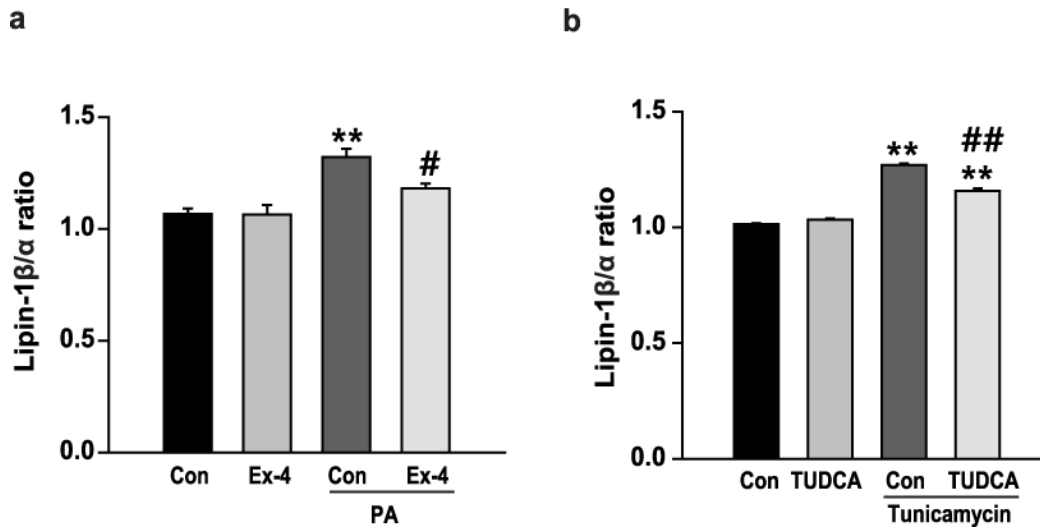

2

3

4 **Supplementary Fig. 1** Exendin-4 and TUDCA decrease lipin-1β/α ratio in cells treated with PA and

5 tunicamycin, respectively. (a) HepG2 cells were pretreated with 400 μM palmitic acid, followed by treatment

6 with or without exendin-4 (Ex-4; 100 nM) for 24 hours. \* $p < 0.05$  and \*\* $p < 0.01$  compared with control cells;

7 # $p < 0.05$  and ## $p < 0.01$  compared with palmitic acid-treated cells. (b) HepG2 cells were pretreated with 3

8 μg/ml tunicamycin (Tuni), followed by treatment with or without TUDCA (400 μM) for 24 hours. \*\* $p < 0.01$

9 compared with control cells; # $p < 0.05$  and ## $p < 0.01$  compared with tunicamycin-treated cells.

10

11

12

13

14

15

16

17

18

19

20

1

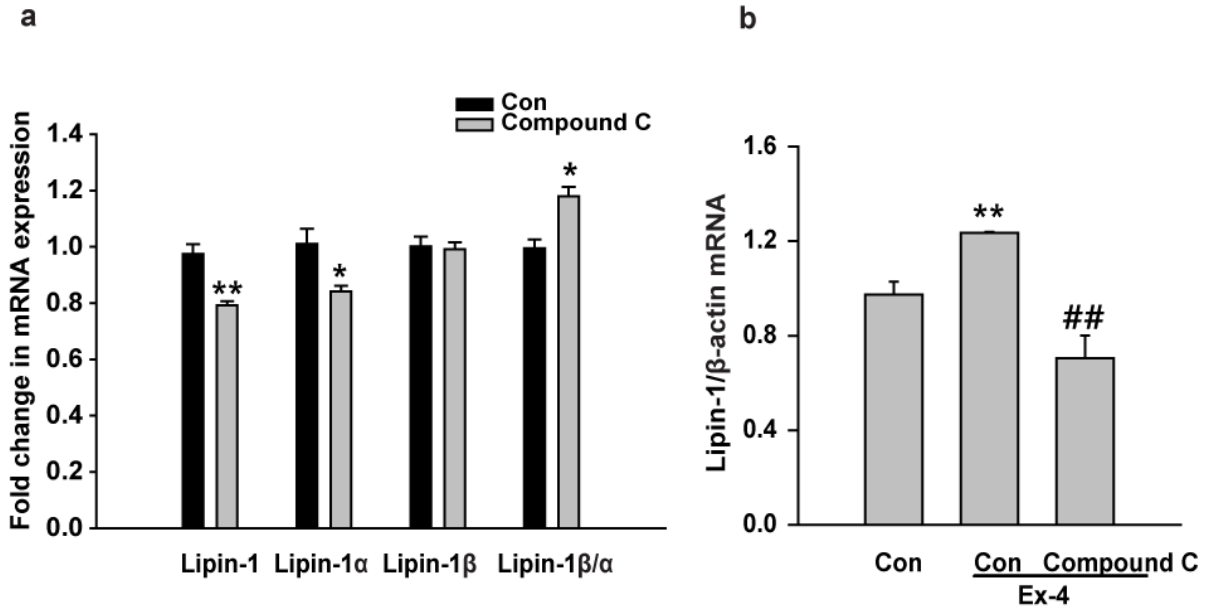

2

3

4 **Supplementary Fig. 2** AMPK inhibitor compound C disrupts lipin-1 signaling in HepG2 cells. (a) HepG2 cells  
5 were pretreated with 10  $\mu$ M compound C for 24 hours. \* $p$  < 0.05 and \*\* $p$  < 0.01 compared with control cells. (b)  
6 HepG2 cells were treated with 100 nM exendin-4 (Ex-4) or exendin-4 + compound C (10  $\mu$ M) for 24 hours. \* $p$  <  
7 0.05 and \*\* $p$  < 0.01 compared with control cells; ## $p$  < 0.01 compared with exendin-4-treated cells.

8

9

10

11

12

13

14

15

16

17

18

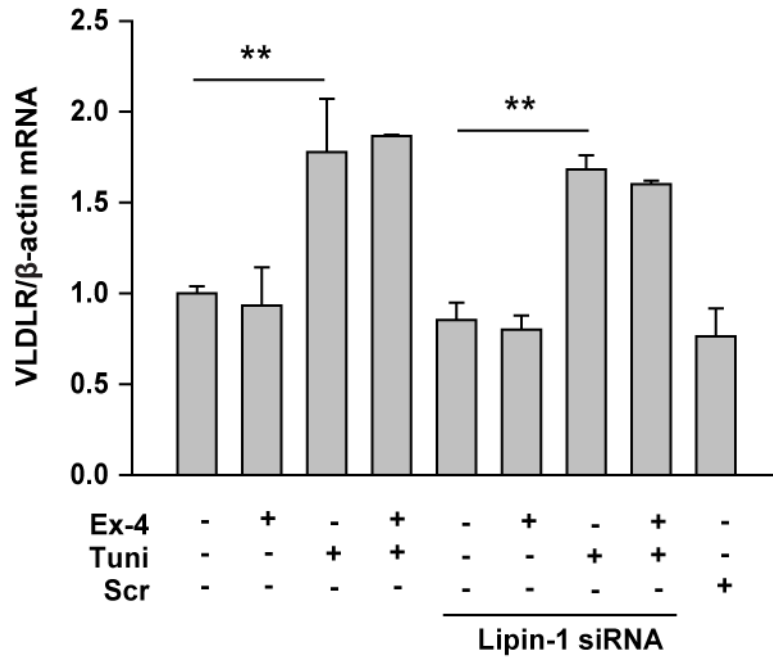

1  
2  
3  
4  
5  
6  
7

**Supplementary Fig. 3** Exendin-4 does not alter VLDLR expression in tunicamycin-treated cells. HepG2 cells were transfected with 10 nM lipin-1 siRNA or control siRNA for 24 hours and were pretreated with 3 μg/ml tunicamycin, followed by treatment with or without exendin-4 (Ex-4; 100 nM) for 24 hours. VLDLR mRNA expression level was analyzed by performing quantitative RT-PCR.
